# Supplementary material for: Biomimetic nanofibrous hybrid hydrogel membranes with sustained growth factor release for guided bone regeneration
Source: Royal Society of Chemistry journal article supplement (doi:10.1039/d0bm01821j), 2021-01-01
Supplement: d0bm01821j1.pdf [file d0bm01821j1.pdf]

## Supporting Information

### **Biomimetic nanofibrous hybrid hydrogel membranes with sustained growth factor release for guided bone regeneration**

*Qingyue Yuan<sup>1,2</sup>, Lunhao Li<sup>1,2</sup>, Yiyu Peng<sup>3</sup>, Ai Zhuang<sup>1,2</sup>, Wei wei<sup>1,2</sup>, Dandan Zhang<sup>1,2</sup>, Yan Pang<sup>1,2\*</sup>,*

*Xiaoping Bi<sup>1,2\*</sup>*

<sup>1</sup>Department of Ophthalmology, Ninth People's Hospital, Shanghai Jiao Tong University School of Medicine, Shanghai, China.

<sup>2</sup>Shanghai Key Laboratory of Orbital Diseases and Ocular Oncology, Shanghai, China.

<sup>3</sup>Department of Ophthalmology, the First Affiliated Hospital of Zhejiang University, Zhejiang, China.

\*Corresponding: Y. Pang (yanpang@shsmu.edu.cn); X. Bi (pinwormgo@126.com).

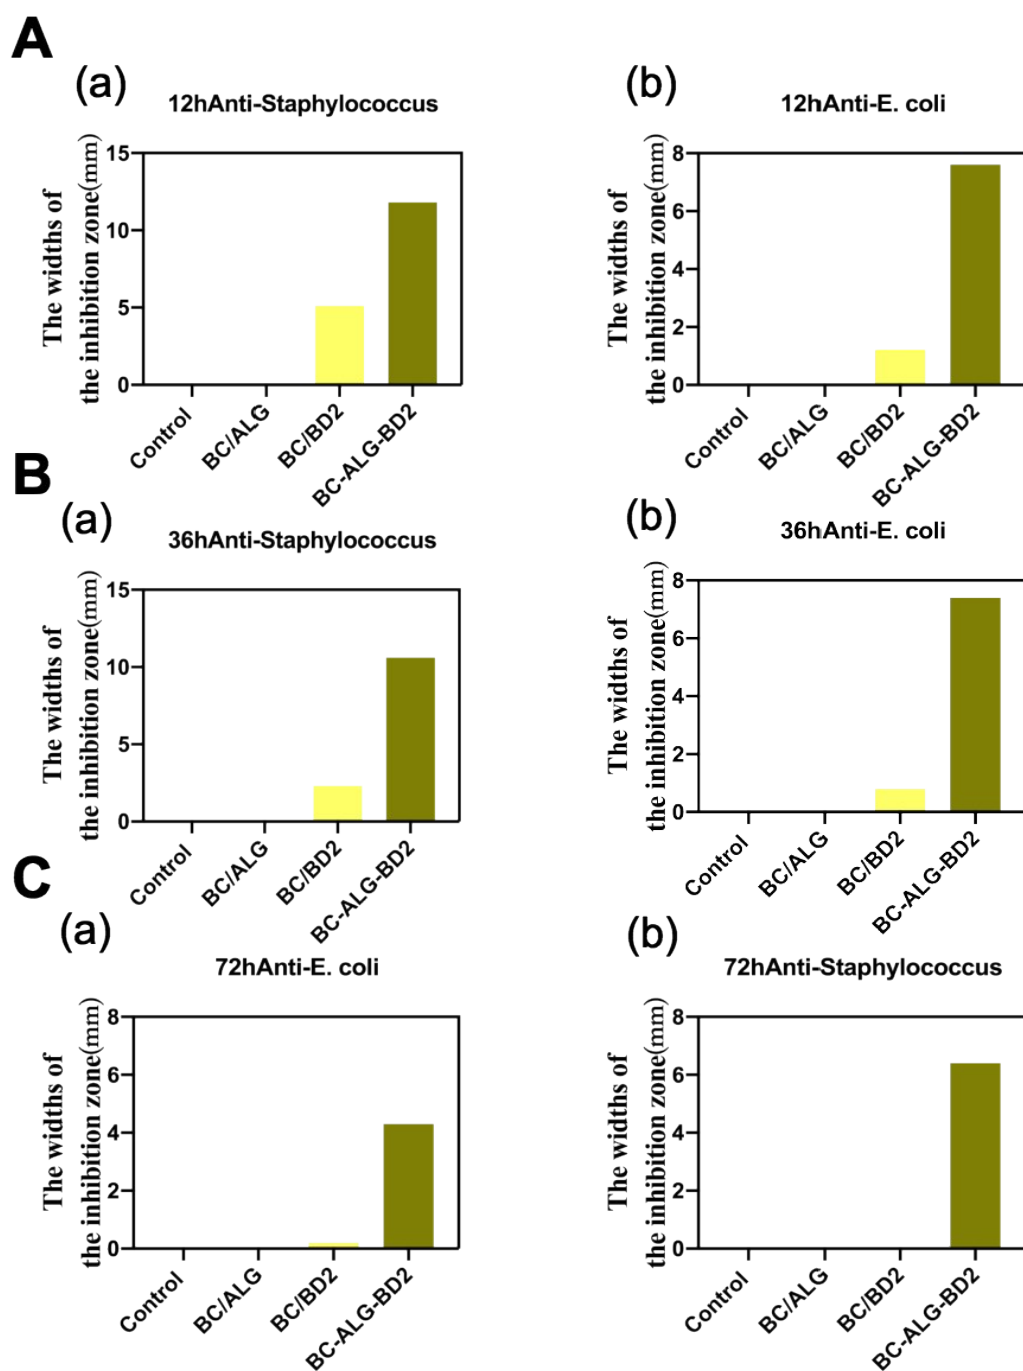

**Figure S1** The diameters of inhibition zones against *Staphylococcus aureus* and *E. coli* with different scaffolds at 12 (A) , 36 (B), 72 (C) hours treatment, respectively.

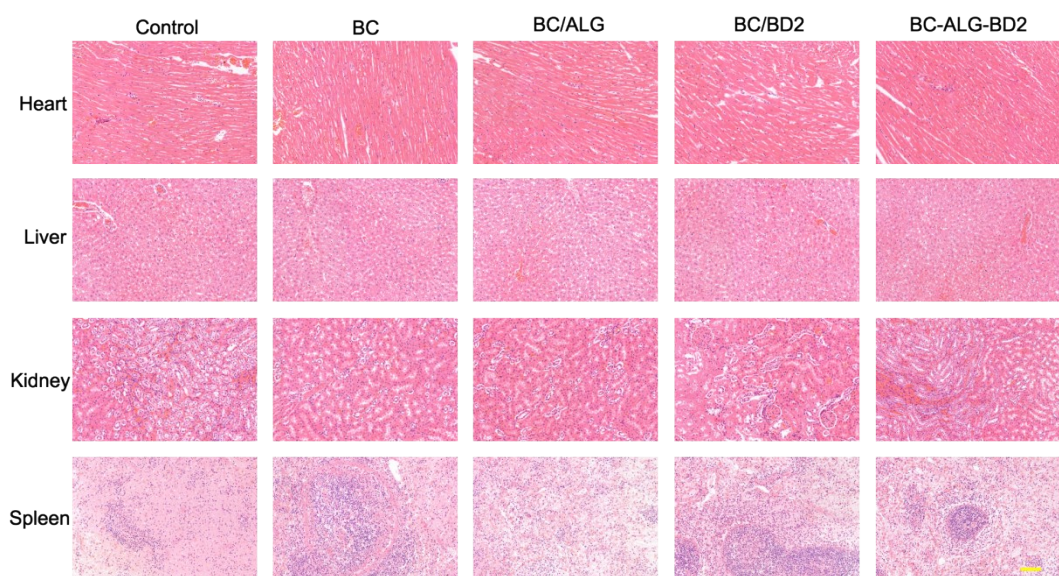

**Figure S2** H&E staining images of heart, liver, kidney and spleen of experimental SD rats at 12 weeks post-implantation.
